---

## Post Stroke Motor Recovery Genome Wide Association Study: A *Domain-Specific Approach*

---

Chad M. Aldridge<sup>1,\*</sup>, Robynne, Braun<sup>2</sup>, Keith L. Keene<sup>3,4</sup>, Fang-Chi Hsu<sup>5</sup>, Michele M. Sale<sup>6</sup>,  
Bradford B. Worrall<sup>1,6</sup>

<sup>1</sup>Department of Neurology, University of Virginia, Charlottesville, VA, USA

<sup>2</sup>Department of Neurology, University of Maryland, Baltimore, MD, USA

<sup>3</sup>Department of Biology, East Carolina University, Greenville, NC, USA

<sup>4</sup>Center for Health Disparities, Brody School of Medicine, East Carolina University, Greenville, NC, USA

<sup>5</sup>Department of Biostatistics and Data Science, Division of Public Health Sciences, Wake Forest University School of Medicine, Winston-Salem, NC, USA

<sup>6</sup>Center for Public Health Genomics, University of Virginia, Charlottesville, VA, USA

\*Corresponding Author

Chad M. Aldridge, PT, DPT, MC-CR, NCS

Department of Neurology

University of Virginia

Charlottesville, VA

cma7n@uvahealth.org

### Abstract

---

**Background:** In this genome wide association study (GWAS) we aimed to discover single nucleotide polymorphisms (SNPs) associated with motor recovery post-stroke. **Methods:** We used the Vitamin Intervention for Stroke Prevention (VISP) dataset of 2,100 genotyped patients with non-disabling stroke. Of these, 488 patients had motor impairment at enrollment. Genotyped data underwent strict quality control and imputation. The GWAS utilized logistic regression models with generalized estimating equations (GEE) to leverage the repeated NIH Stroke Scale (NIHSS) motor score measurements spanning 6 time points over 24 months. The primary outcome was a decrease in the motor drift score of  $\geq 1$  vs.  $< 1$  at each timepoint. Our model estimated the odds ratio of motor improvement for each SNP after adjusting for age, sex, race, days from stroke to visit, initial motor score, VISP treatment arm, and principal components.

**Results:** Although no associations reached genome-wide significance ( $p < 5 \times 10^{-8}$ ), our analysis detected 115 suggestive associations ( $p < 5 \times 10^{-6}$ ). Notably, we found multiple SNP clusters near genes with plausible neuronal repair biology mechanisms. The CLDN23 gene had the most convincing association which affects blood-brain barrier integrity, neurodevelopment, and immune cell transmigration. **Conclusion:** We identified novel suggestive genetic associations with the first ever motor-specific post stroke recovery GWAS. The results seem to describe a distinct stroke recovery phenotype compared to prior genetic stroke outcome studies that use outcome measures, like the mRS. Replication and further mechanistic investigation are warranted. Additionally, this study demonstrated a proof-of-principle approach to optimize statistical efficiency with longitudinal datasets for genetic discovery.

## 1 Introduction

2 A reckoning is coming to the field of stroke recovery and genomics. The research, now merging  
3 at the intersection of these fields, faces three major challenges. First, a majority of the studies on  
4 stroke-related genes use a candidate gene approach [1], while there are only two genome-wide  
5 association study published to date [2, 3]. Current understanding of stroke recovery genetics is  
6 therefore limited to an extremely small portion of the genome, encompassing only 11 associated  
7 genes [1]. However the complex and time-varying biology of stroke recovery is likely to involve a  
8 much greater proportion of the genome. This suggests that study designs using genome-wide [4]  
9 and epigenome-wide [5] associations are well suited to discover novel recovery-associated genes  
10 and their variations. The second issue is that acute stroke treatment trials often collect blood  
11 samples useful for subsequent genetic studies. However, they tend to lack detailed measures of  
12 stroke recovery. Conversely, stroke recovery trials frequently collect these detailed and  
13 domain-specific outcome measures, but lack biospecimens for subsequent genetic analyses. The  
14 third challenge entails the issue that most studies on stroke recovery-related genes have defined  
15 their recovery phenotypes using global outcome measures that combine multiple domains of  
16 impairment (e.g. the modified Rankin Scale or total NIH Stroke Scale score) rather than using  
17 domain-specific measures (e.g. the Upper Extremity Fugl-Meyer for the motor domain) [6].  
18 It remains unclear whether the phenotype-genotype associations observed using multi-domain  
19 measures differ from those observed using domain-specific measures of stroke recovery. For  
20 example variants of the BDNF (brain derived neurotrophic factor) gene have shown to predict  
21 poor stroke outcomes defined as the 90-day modified Rankin Scale (mRS) score  $\leq 1$  for ischemic  
22 stroke, or Glasgow Outcome Scale score  $\leq 3$  for hemorrhagic stroke [7]. However, Cramer and  
23 colleagues [8] recently showed that BDNF variants were not associated with a domain-specific  
24 measure of arm motor function. This suggests that change in a multi-domain outcome measure  
25 may represent a different phenotype-genotype relationship than change in a domain-specific  
26 measure. The distinction is not trivial. As noted in the Stroke Recovery and Rehabilitation  
27 Roundtable [9] guidelines, “brain repair maps best onto fine-grained movement quality measures  
28 that are sensitive and specific.” In other words, using domain-specific measures of stroke  
29 recovery is better suited for studies that aim to discover genetic mechanisms of brain plasticity.

30 Thus, genetic studies of stroke recovery using domain-specific measures are urgently needed.  
31 In an effort to address this need, Braun and colleagues [10] argued that changes in NIHSS  
32 subscores, which measure impairment in distinct neurological domains, can be considered as an  
33 efficient and clinically feasible means to obtain domain-specific measures of stroke recovery.  
34 They noted that the NIHSS motor impairment subscores are comparable to the Fugl-Meyer in  
35 terms of being specific to arm and leg motor function. They also have good inter-rater reliability  
36 ( $\kappa$  0.77-0.78). The present study is the first effort to define a phenotype-genotype  
37 association specific to post stroke motor-recovery using the change in NIHSS subscores.

## 38 **2 Methods and Materials**

### 39 **2.1 Discovery Cohort**

40 The Vitamin Intervention for Stroke Prevention trial (VISP) investigated the effect of vitamin  
41 supplementation dose on the risk of recurrent stroke with a randomized double-blinded design.  
42 The study enrolled patients who had a non-disabling ischemic stroke ( $mRS < 3$ )  $\geq$  72 hours prior  
43 to enrollment. Patients were randomized to a high dose or low dose vitamin supplementation arm  
44 if they were at least 75% compliant of taking a low dose supplementation packet for one month  
45 prior. All patients were reassessed every 3 months until a recurrent stroke event, but not longer  
46 than 2 years [11]. The trial successfully enrolled a total of 3680 randomized patients. This study  
47 was approved by the internal review boards (IRBs) of Wake Forest University School of Medicine,  
48 University of North Carolina at Chapel Hill School of Medicine as well as individual recruiting sites  
49 in accordance with the declaration of Helsinki. All patients provided written informed consent [12].  
50 However, ten sites did not approve the genetic portion of the study resulting in 2,100 genotyped  
51 patients. We included only those that had a motor drift weakness of an arm or leg at the initial  
52 measurement of the NIH stroke scale at randomization. We excluded patients that had an  
53 incident recurrent stroke during the trial. This resulted in 488 participants in this GWAS.

## 54 **2.2 Quality Control**

55 The Center for Inherited Disease Research at Johns Hopkins University performed genotyping on  
56 the Illumina HumanOmni1-Quad-v1 array(Illumina, Inc.) The genotyped data underwent strict  
57 quality control measures that filtered out SNPs as follows: 1) missing call rate > 2%, 2)  
58 Mendelian errors in control trios, 3) deviation from Hardy-Weinburg equilibrium in controls, 4)  
59 discordant calls in duplicate samples, 5) sex differences in allele frequency or heterozygosity, 6)  
60 and minor allele frequency < 0.05 in line with previously published recommendations [13]. We  
61 further increased the number of SNP with genetic imputation via the TOPMed Imputation server  
62 [14, 15] which implements the Minimac Imputation procedure [16]. The TOPMed study [14] has a  
63 large cohort of 97,256 individuals with a diverse set of backgrounds which was preferred because  
64 of the sizeable proportion of non-European ancestry participants in the VISP genotyped cohort.  
65 After filtering out imputed SNPs with poor imputation quality ( $r^2 < 0.80$ ) and MAFs < 0.05, the  
66 final count of SNPs came to 6,588,085.

## 67 **2.3 Phenotyping**

68 As suggested [10], we utilized the motor drift subscores of the NIHSS as a measurement of motor  
69 weakness. The NIHSS subscores 5A/5B and 6A/6B defined the degree of limb weakness for the  
70 upper and lower extremities also known as drift. The subscores rate limb weakness or drift on an  
71 ordinal scale from 0 to 5: 0 is no drift, 1 drift is present, 2 observed some effort against gravity, 3  
72 shows no effort against gravity, 4 there is no movement, and 5 the limb is amputated. Motor  
73 improvement is defined as the decrease in the initial motor drift subscore of the weakest limb from  
74 enrollment to each follow up period. If patients had equally affected upper and lower limbs, we  
75 chose the upper limb. To maximize statistical power and model stability, we chose to dichotomize  
76 motor improvement as a decrease in initial motor drift by  $\geq 1$  versus  $< 1$  for each follow up period.

## 77 **2.4 Data Analysis Plan**

78 We implemented a logistic regression model with generalized estimating equations (GEE) with  
79 the "gee" R package [17]. The GEE model allows the incorporation of repeated measurements of  
80 the motor drift subscore over the 2 year trial duration[18], which provides notable statistical power

81 gains compared to the traditional case/control GWAS study design.

82 A priori we planned to adjust for age, sex, initial motor drift score, treatment arm, and population  
83 stratification via principle components. We calculated the top ten principle components utilizing  
84 the KING software [19] to account for population stratification in our cohort with genotyped SNPs  
85 after pruning. To determine which principle components to include in GWAS model, we used a  
86 backwards selection procedure optimizing the AIC with the "stepAIC" function from the MASS R  
87 package [20]. This approach allows for more efficient population stratification adjustment.

88 In addition to the *a priori* covariates, time since stroke onset is an important covariate when  
89 modeling stroke recovery because of changing rates of recovery based on well defined time  
90 epochs(i.e. Acute, Early and Late Subacute, and Chronic)[21]. These epochs are tied to  
91 biological processes of inflammation and scarring early on into recovery with a transition to  
92 mainly endogenous plasticity in later stages. To account for this effect in the model, we added the  
93 covariate of time from stroke onset to time of motor drift measurement in days for each follow up  
94 period. Furthermore, we investigated the non-linear relationship of this covariate via binning the  
95 time from stroke onset to follow up period into quartiles. Figure 1 shows the mean estimated  
96 probability of motor drift improvement by each quartile. We decided to use a spline of time from  
97 onset to measurement with 1 knot at 250 days to better model the non-linear relationship and  
98 maintain clinical interpret-ability of the model for planned sensitivity analysis.

99 Lastly, we considered possible loss to follow up effects. We planned to investigate which baseline  
100 characteristics predict missing motor drift scores. Any associated baseline characteristics would  
101 be added to the final GEE model with an exchangeable correlation structure as covariates.

## 102 **2.5 Sensitivity Analysis**

103 We performed two sensitivity analyses. First, we evaluated the interaction of time of stroke onset  
104 to follow-up period spline with each SNP that reached a p-value threshold of  $p < 5 \times 10^{-6}$ . We  
105 suspected that the effect of the SNP may change depending on the stroke recovery phase.

106 Secondly, we observed a wide spread of time from stroke onset to VISP randomization (median  
107 72 days; IQR 45.75 - 102 days). We generated an early versus late post-stroke enrollment  
108 variable defined as  $<$  the median (72 days) being early and  $\geq$  the median as late enrollment,

109 then estimate its interaction with each SNP as a separate sensitivity analysis.

## 110 **2.6 Look-Up Analysis**

111 We wished to investigate if the reported SNPs from the GISCOME GWAS study [2] on stroke  
112 functional recovery replicate with our post stroke motor recovery associated SNPs. The  
113 GISCOME study is the largest post stroke recovery GWAS by combined sample size ( $n = 6,021$ )  
114 from 12 studies. Söderholm et al. defined good recovery as a mRS of  $\leq 2$  and a mRS of  $\geq 3$   
115 signified poor recovery. We planned to compare our GWAS results with all SNPs with a p value  
116  $< 5 \times 10^{-6}$  from the GISCOME study. The p-values of the look-up analysis will receive a multiple  
117 comparison adjustment at a FDR of 10%. We chose the 10% rate because the look-up analysis  
118 has SNPs in linkage disequilibrium. The FDR algorithm assumes that each hypothesis test is  
119 independent from one another, which is violated when applied to SNPs within linkage  
120 disequilibrium. This violation biases the adjusted p-values to the null which makes a FDR of 5%  
121 exceedingly conservative.

## 122 **3 Results**

### 123 **3.1 Demographics**

124 The 488 patients provided 2,095 individual observations over the entire VISIP study 2 year period  
125 from enrollment to months 1, 6, 12, 18 and 24. Patients had a median (IQR) 5 (4-5) number of  
126 motor drift assessments with a minimum of 1 to a maximum of 5. Twenty six point six percent of  
127 patients were lost to follow up by the 24 month visit. We found that sex and self-identified race  
128 were associated with loss to follow up. Males made up 76% patients that were lost to follow  
129 versus 59% ( $p < 0.001$ ). Patients that identified as Black were more likely to be lost to follow up  
130 (30% vs 15%;  $p < 0.001$ ). In contrast, self-identified White patients were less likely to be lost to  
131 follow up (62% versus 77%;  $p < 0.001$ ). Table 1 shows the demographics of this cohort. As  
132 expected, most of the patients had worse arm weakness (67%) than leg weakness likely due to  
133 the VISIP inclusion criteria of non-disability strokes defined by a mRS  $\leq 3$ . It is well known that  
134 the higher mRS scores are biased toward lower extremity weakness and inability to walk

135 compared to upper extremity weakness. Of note, the distribution of patient ancestry generally  
136 reflects the national U.S. population.

## 137 **3.2 GWAS**

### 138 **3.2.1 Primary Results**

139 None of the SNPs reached genome-wide significance ( $p < 5 \times 10^{-8}$ ). However, 115 SNPs  
140 reached suggestive associations with motor improvement ( $p < 5 \times 10^{-6}$ ). Figure 2 plots the  
141 p-values of the odds ratio of motor improvement for each SNP. The calculated genomic control  $\lambda$   
142 of the GWAS is 1.01, which suggests no genomic inflation. Therefore, we did not adjust the  
143 p-values.

144 The suggestive SNPs found themselves in chromosomes 1 (3), 6 (1), 8 (92), 9 (6), 12 (6), 14 (1),  
145 16 (1), and 18 (5). The top two SNPs, rs12681936 and rs12680789, in chromosome 8 had the  
146 smallest p-values ( $5.96 \times 10^{-8}$ ), which were just shy of genome-wide significance ( $p < 5 \times 10^{-8}$ ).  
147 See Supplement Table 1 for a full list of all suggestive SNP associations with annotations from  
148 Ensembl.org's variant effect predictor software [22]. Figure 2 shows a strong signal on  
149 chromosome 8. This locus is better visualized by the locus zoom plot in Figure 3 A. This locus is  
150 within  $< 0.1$  megabases of the CLD23 gene.

### 151 **3.2.2 Sensitivity Analysis**

152 Sensitivity analysis of the interaction between the spline of stroke onset to motor drift  
153 measurement revealed that two SNPs had significant interactions at a FDR of 10%. They were  
154 rs113693489 in chromosome 6 and rs2967308 in chromosome 16. Supplement Table 2 contains  
155 all the interaction estimates and their q values. In general, SNP interactions with the first part of  
156 the spline (Days from stroke onset to measurement  $< 250$ ) had a mean ( $\pm$  sd) Odds Ratio of  
157 0.967 ( $\pm 1.33$ ). The interactions with the second part of the spline ( $\geq 250$  days) had a mean ( $\pm$   
158 sd) Odds Ratio of 0.806 ( $\pm 1.33$ ). Highlighting the chromosome 8 locus, Figure 4 shows the odds  
159 ratio point estimate and their 95% confidence intervals.

160 The second sensitivity analysis focused on the interaction of the suggestive SNPs based on early  
161 versus later enrollment into the VISIP trial from stroke onset. The SNPs' p-values underwent a



162 FDR adjustment of 10%. In contrast to the interaction analysis, all Early and Late enrollment  
163 q-values were significant; See Supplemental Table 3. Early enrollment interactions had a mean  
164 ( $\pm$  sd) Odds Ratio of 0.419 ( $\pm$  1.68). Late enrollment interaction had a similar mean ( $\pm$  sd) Odds  
165 Ratio of 0.397 ( $\pm$  1.70). Figure 5 exhibits the estimates for each suggestive SNP interaction with  
166 Early versus Late enrollment in the chromosome 8 locus. While our sensitivity analysis models  
167 show that each SNP interaction is an independent predictor of motor improvement, the 95%  
168 confidence intervals have large overlaps. The overlaps suggest that Odds Ratios for each SNP  
169 interaction do not differ from Early versus Late enrollment in the VISIP trial from stroke onset.

### 170 **3.2.3 Look-Up Analysis**

171 Out of the 500 reported SNPs ( $p < 5 \times 10^{-6}$ ) from the GISCOME study [2], only 414 were present  
172 in our analysis results. After applying a FDR of 10%, none of the look up SNPs from the  
173 GISCOME study reached significance.

## 174 **4 Discussion**

175 Our GWAS of post stroke motor recovery failed to show genome-wide significant associations.  
176 However, we found 115 novel suggestive SNPs linked to the odds of motor recovery over a two  
177 years in the first ever motor-specific post stroke recovery GWAS. These suggestive SNPs  
178 mapped to genomic loci connected to genes that are previously unknown as either candidate  
179 genes or ones from prior GWAS studies [2, 3]. Following from here, we discuss the genetic loci of  
180 interest associated with motor recovery individually.

### 181 **4.1 Post Stroke Motor Recovery Genetic Loci**

182 The Chromosome 8 locus's apex, as seen in Figure 3 A, is  $< 0.1$  megabases from the CLD23  
183 gene. CLD23 (Claudin 23) is a protein encoding gene part of the Claudin gene family which are  
184 integral membrane proteins and components to tight junction strands[23]. CLDN23 has related  
185 pathways affecting the blood brain barrier and immune cell transmigration according to  
186 [genecards.org's pathway unification database \(https://pathcards.genecards.org/\)](https://pathcards.genecards.org/).



187 Additionally, CLDN23 variants are associated with blood cholesterol, triglyceride, and lipid  
188 measurements[24–26].

189 Unlike the chromosome 8 locus, the chromosome 9 locus finds itself within the PTPRD gene; part  
190 of the protein tyrosine phosphate (PTP) family. The PTPRD gene has a protein to protein  
191 interaction at the neuronal synapse located at the presynaptic terminal surface. It has related  
192 pathways of cell growth, differentiation, mitotic cycle, and oncogenic transformation[27, 28].

193 Interestingly, PTPRD has an association with glioblastoma [29].

194 Figure 3 C shows the chromosome 12 locus within in the RIMS-Binding Protein (RIMBP2) gene.

195 As the name suggests, this gene produces a binding protein. The function of this protein is  
196 predicted to involve neuromuscular synaptic transmission. It is also highly expressed in brain  
197 tissue. Butola et al. in 2021 reported that the role of RIM-BP2 is to link voltaged-gated  $Ca^{2+}$   
198 channels and release sites of synaptic vesicles[30]. They explain that RIMBP2 disruption leads to  
199 alterations in Cav2.1 channel topography at active zones. These active zones affect  
200 neurotransmitter release. The top SNP (rs73156962) of this locus has a direct biological  
201 interpretation ( $p = 0.034$ ) in nucleus accumbens located in the basal ganglia, a highly dense  
202 interconnected neuronal tissue [31].

203 The chromosome 18 locus sits almost equally between two genes, RTTN and SOCS6, each  
204 within 0.1 megabases. See Figure 3 D. RTTN (Rotatin) encodes a large protein without a known  
205 specific function. However, knockout mice models result in neural tube defects [32]. In humans,  
206 RTTN pathological variants lead to microcephaly and polymicrogyria with seizures [33, 34]. Even  
207 though RTTN is linked to neurological structure and disorder in humans, there remains a notable  
208 lack of published literature on this gene and its biological mechanisms. However, SOCS6  
209 (Supressor of Cytokine Signalling 6) is part of the supressor cytokine signalling protein family  
210 which plays a key role in inflammation regulation and insulin signalling in human brain tissue,  
211 especially brain tissue affected by a neuro-degenerative disease [35].

## 212 **4.2 Literature Comparison**

213 Söderholm et al. [2] performed the largest GWAS of stroke functional recovery to date. Their  
214 analysis consisted of 12 studies which totaled 6,021 patients. They defined functional stroke

215 recovery as the obtainment of a mRS score  $\leq 2$  as "Good Recovery" versus  $\geq 3$  as "Poor  
216 Recovery" in their case/control approach. The study found only 1 SNP (rs1842681) significant at  
217 the genome-wide level ( $p < 5 \times 10^{-8}$ ) located in the LOC105372028 gene. The LOC105372028  
218 gene has no known biological function. They also found 33 suggestive SNPs among 12 different  
219 loci. When they utilized the mRS scores as a ordinal response instead of a binary one, the  
220 number of suggestive SNPs increased to 75 spread over 17 distinct loci without an increase in  
221 genome-wide significant SNPs.

222 When comparing Söderholm et al.'s study with ours, there are two notable distinctions. First, the  
223 set of associated genes of each study are unique. None of our associated genes replicated with  
224 theirs. This fact is intriguing because the unique set of genes from each study may be due to the  
225 functional recovery measures utilized. Our GWAS analysis used the motor drift scores from the  
226 NIHSS as a specific motor behavior marker. Plus, most of the patients in our discovery cohort  
227 had the greatest weakness in the upper extremity instead of the lower which suggests that motor  
228 drift score changes may not correlate with changes in the mRS. Unlike the motor drift score, the  
229 mRS encompasses multiple phenotypic domains like cognition, motor strength, balance, and  
230 mortality. The mRS measure has the probability of associating with genes that have general or  
231 systemic biological effects as well as include genes expressed in other tissues that interact with  
232 brain tissue like cardiovascular and lymphatic tissues.

233 The second distinction is the clear difference in the number of patients in each study, ours  
234  $n = 488$  and Söderholm et al.  $n = 6,201$ . We capitalized on the repeated motor drift scores  
235 measurements. The logistic regression model with GEE greatly enhanced the statistical  
236 efficiency to find SNPs of interest associated with post-stroke motor recovery. In fact this study's  
237 had about one-tenth the minimum recommended sample size for GWAS studies [36, 37]. Thus,  
238 our analysis is a proof-of-principle that longitudinal observational studies can be a strong design  
239 for future stroke recovery genomic studies.

240 To note, the genetic loci of Söderholm et al. and ours, did not include well published candidate  
241 stroke recovery genes of APOE, BDNF or COX-2 [1, 38–41]. This has particular interest since  
242 one would imagine that at least one of these genes would present themselves in either our results  
243 or those of Söderholm et al. Even more so in line with Söderholm et al. because of the use of the  
244 mRS as a recovery measure like previous candidate gene studies. One possible explanation is

245 that GWAS studies remain too under-powered to detect the effect size of known candidate genes.  
246 The effect sizes of the candidate genes may be smaller than anticipated. To address the issue of  
247 being under-powered, the stroke recovery community needs more genetic data linked to specific  
248 stroke recovery phenotypes of interest or at least capitalize on observational stroke outcome  
249 studies with longitudinal designs overlaid on relevant recovery milestones.

### 250 **4.3 Limitations**

251 Unfortunately, our study does not have a replication cohort, despite searching internationally for  
252 other cohorts with NIHSS subscores and genetic data. For example, the National Institute of  
253 Neurological Disorders and Stroke (NINDS) archived clinical research database has 22 publicly  
254 available stroke study datasets, but none of them have NIHSS subscores and genetic data.  
255 However, we performed a look-up analysis based on Söderholm et al.'s findings [2] as a  
256 reasonable surrogate replication cohort. Another limitation of study is related to the VISP  
257 enrollment criteria. Patients enrolled into the VISP trial must have had a stroke due to  
258 atheroembolic mechanisms. Potential patients were excluded if their stroke was the result of a  
259 cardioembolic source. It is possible that our discovery cohort of patients had more small vessel  
260 strokes compared to large artery and other stroke types. The biological mechanisms deployed  
261 and their effect on stroke recovery may differ among these subtypes, especially since large artery  
262 and cardioembolic stroke tend to have larger stroke lesion volumes than small vessel strokes.  
263 Small vessel stroke may relate more to chronic inflammatory or hypertension exposures which  
264 may explain CLDN23 as the most promising finding. Unfortunately, the VISP trial did not collect  
265 stroke subtype data like the TOAST criteria [42]. We are unable to investigate how the genetic  
266 associations may differ among stroke subtypes.

## 267 **5 Conclusion**

268 We demonstrated the first ever use of repeated measurements and a domain-specific phenotype  
269 in a stroke recovery GWAS. This resulted in the discovery of new genes associations. As a  
270 proof-of-principle, this GWAS repurposed the NIHSS in a rich stroke clinical trial data set in line  
271 with the recommendations from Braun et al. [10] and the Stroke Recovery and Rehabilitation

272 Roundtable [9]. This study's approach may have a great impact on future genetic stroke study  
273 design. Longitudinal design allows one to investigate if the SNP effect is associated with changes  
274 over time, which we believe is critical in stroke recovery genetics research.

## 275 **6 Author Contributions**

276 CA, RB, KK, FH, BW contributed to the conception and design of the study. MS and BW were  
277 instrumental in the acquisition of phenotype and genotype data. CA and BW performed  
278 phenotype harmonization. CA performed the statistical analysis. FH consulted on the statistical  
279 analysis. CA wrote the first draft of the manuscript. All authors contributed to manuscript revision,  
280 read, and approved the submitted version.

## 281 **7 Acknowledgments**

282 We wish to thank all of the participants in the Vitamin Intervention for Stroke Prevention trial that  
283 made this study possible. The authors acknowledge Research Computing at The University of  
284 Virginia for providing computational resources and technical support that have contributed to the  
285 results reported within this publication. URL: <https://rc.virginia.edu>

## 286 **8 Funding**

287 The GWAS component of the VISP study was supported by the United States National Human  
288 Genome Research Institute (NHGRI), Grant U01 HG005160 (PI Michèle Sale & Bradford  
289 Worrall), as part of the Genomics and Randomized Trials Network (GARNET). Genotyping  
290 services were provided by the Johns Hopkins University Center for Inherited Disease Research  
291 (CIDR), which is fully funded through a federal contract from the NIH to the Johns Hopkins  
292 University. Assistance with data cleaning was provided by the GARNET Coordinating Center  
293 (U01 HG005157; PI Bruce S Weir). Study recruitment and collection of datasets for the VISP  
294 clinical trial were supported by an investigator-initiated research grant (R01 NS34447; PI James  
295 Toole) from the United States Public Health Service, NINDS, Bethesda, Maryland. Control data

296 for comparison with European ancestry VISP stroke cases were obtained through the database  
297 of genotypes and phenotypes (dbGAP) High Density SNP Association Analysis of Melanoma:  
298 Case-Control and Outcomes Investigation (phs000187.v1.p1; R01CA100264, 3P50CA093459,  
299 5P50CA097007, 5R01ES011740, 5R01CA133996, HHSN268200782096C; PIs Christopher  
300 Amos, Qingyi Wei, Jeffrey E. Lee). For VISP stroke cases of African ancestry, a subset of the  
301 Healthy Aging in Neighborhoods of Diversity across the Life Span study (HANDLS) were used as  
302 stroke free controls. HANDLS is funded by the National Institute of Aging (1Z01AG000513; PI  
303 Michele K. Evans).

## 304 **9 Disclosures**

305 The authors declare that the research was conducted in the absence of any commercial or  
306 financial relationships that could be construed as a potential conflict of interest. Dr. Bradford  
307 Worrall is the Deputy Editor for the journal *Neurology*.

## 308 **10 Data Availability Statement**

309 The genetic associations results generated by this study can be found in the Cerebrovascular  
310 Disease Knowledge Portal (<https://cd.hugeamp.org/XXXX>).

## 311 **References**

- 312 1. Lindgren, A. & Maguire, J. Stroke recovery genetics. *Stroke* **47**, 2427–2434 (2016).
- 313 2. Söderholm, M. *et al.* and the Genetics of Ischaemic Stroke Functional Outcome (GISCOME)  
314 Network. Genome-wide association meta-analysis of functional outcome after ischemic  
315 stroke. *Neurology* **92**, e1271–e1283 (2019).
- 316 3. Mola-Caminal, M. *et al.* PATJ low frequency variants are associated with worse ischemic  
317 stroke functional outcome: a genome-wide meta-analysis. *Circulation research* **124**,  
318 114–120 (2019).

- 319 4. Tam, V. et al. Benefits and limitations of genome-wide association studies. *Nature Reviews*  
320 *Genetics* **20**, 467–484 (2019).
- 321 5. Campagna, M. P. et al. Epigenome-wide association studies: current knowledge, strategies  
322 and recommendations. *Clinical epigenetics* **13**, 1–24 (2021).
- 323 6. Fugl-Meyer, A. R., Jääskö, L., Leyman, I., Olsson, S. & Steglind, S. A method for evaluation  
324 of physical performance. *Scand J Rehabil Med* **7**, 13–31 (1975).
- 325 7. Siironen, J. et al. The Met allele of the BDNF Val66Met polymorphism predicts poor outcome  
326 among survivors of aneurysmal subarachnoid hemorrhage. *Stroke* **38**, 2858–2860 (2007).
- 327 8. Cramer, S. C. et al. Genetic Factors, Brain Atrophy, and Response to Rehabilitation  
328 Therapy After Stroke. *Neurorehabilitation and neural repair* **36**, 131–139 (2022).
- 329 9. Kwakkel, G. et al. Standardized measurement of quality of upper limb movement after  
330 stroke: consensus-based core recommendations from the second stroke recovery and  
331 rehabilitation roundtable. *Neurorehabilitation and neural repair* **33**, 951–958 (2019).
- 332 10. Braun, R. G. et al. What the Modified Rankin Isn't Ranking: Domain-Specific Outcomes for  
333 Stroke Clinical Trials. *Neurology* (2021).
- 334 11. Toole, J. F. et al. Lowering homocysteine in patients with ischemic stroke to prevent  
335 recurrent stroke, myocardial infarction, and death: the Vitamin Intervention for Stroke  
336 Prevention (VISP) randomized controlled trial. *JAMA* **291**, 565–75. ISSN: 1538-3598.  
337 <http://www.ncbi.nlm.nih.gov/pubmed/14762035> (5 Feb. 2004).
- 338 12. Keene, K. L. et al. Genetic associations with plasma B12, B6, and folate levels in an  
339 ischemic stroke population from the Vitamin Intervention for Stroke Prevention (VISP) trial.  
340 *Frontiers in public health* **2**, 112 (2014).
- 341 13. Consortium, I. H. 3. et al. Integrating common and rare genetic variation in diverse human  
342 populations. *Nature* **467**, 52 (2010).
- 343 14. Taliun, D. et al. Sequencing of 53,831 diverse genomes from the NHLBI TOPMed Program.  
344 2019. *Genomics* (2019).
- 345 15. Das, S. et al. Next-generation genotype imputation service and methods. *Nature genetics*  
346 **48**, 1284–1287 (2016).

- 347 16. Fuchsberger, C., Abecasis, G. R. & Hinds, D. A. minimac2: faster genotype imputation.  
348 *Bioinformatics* **31**, 782–784 (2015).
- 349 17. Vincent J Carey, T. L., src/dgedi.f, B. R. F. &  
350 src/dgefa.f are for LINPACK authored by Cleve Moler. Note that maintainers are not  
351 available to give advice on using a package they did not author. *gee: Generalized*  
352 *Estimation Equation Solver* R package version 4.13-20 (2019).  
353 <https://CRAN.R-project.org/package=gee>.
- 354 18. Zeger, S. L. & Liang, K.-Y. Longitudinal data analysis for discrete and continuous outcomes.  
355 *Biometrics*, 121–130 (1986).
- 356 19. Manichaikul, A. et al. Robust relationship inference in genome-wide association studies.  
357 *Bioinformatics* **26**, 2867–2873 (2010).
- 358 20. Venables, W. N. & Ripley, B. D. *Modern Applied Statistics with S* Fourth. ISBN  
359 0-387-95457-0. <https://www.stats.ox.ac.uk/pub/MASS4/> (Springer, New York, 2002).
- 360 21. Bernhardt, J. et al. Agreed definitions and a shared vision for new standards in stroke  
361 recovery research: the stroke recovery and rehabilitation roundtable taskforce. *International*  
362 *Journal of Stroke* **12**, 444–450 (2017).
- 363 22. McLaren, W. et al. The ensembl variant effect predictor. *Genome biology* **17**, 1–14 (2016).
- 364 23. Katoh, M. & Katoh, M. CLDN23 gene, frequently down-regulated in intestinal-type gastric  
365 cancer, is a novel member of CLAUDIN gene family. *International journal of molecular*  
366 *medicine* **11**, 683–689 (2003).
- 367 24. Sinnott-Armstrong, N. et al. Genetics of 35 blood and urine biomarkers in the UK Biobank.  
368 *Nat Genet* **53**, 185–194 (Feb. 2021).
- 369 25. Richardson, T. G. et al. Characterising metabolomic signatures of lipid-modifying therapies  
370 through drug target mendelian randomisation. *PLoS Biol* **20**, e3001547 (Feb. 2022).
- 371 26. Adewuyi, E. O., Mehta, D. & Nyholt, D. Genetic overlap analysis of endometriosis and  
372 asthma identifies shared loci implicating sex hormones and thyroid signalling pathways.  
373 *Human Reproduction* **37**, 366–383 (2022).



- 374 27. Pulido, R., Krueger, N. X., Serra-Pagès, C., Saito, H. & Streuli, M. Molecular  
375 Characterization of the Human Transmembrane Protein-tyrosine Phosphatase  $\delta$ :  
376 EVIDENCE FOR TISSUE-SPECIFIC EXPRESSION OF ALTERNATIVE HUMAN  
377 TRANSMEMBRANE PROTEIN-TYROSINE PHOSPHATASE  $\delta$  ISOFORMS ( $\square$ ). *Journal of*  
378 *Biological Chemistry* **270**, 6722–6728 (1995).
- 379 28. Mizuno, K. *et al*. MPTP delta, a putative murine homolog of HPTP delta, is expressed in  
380 specialized regions of the brain and in the B-cell lineage. *Molecular and cellular biology* **13**,  
381 5513–5523 (1993).
- 382 29. Wu, G. *et al*. The genomic landscape of diffuse intrinsic pontine glioma and pediatric  
383 non-brainstem high-grade glioma. *Nature genetics* **46**, 444 (2014).
- 384 30. Butola, T. *et al*. RIM-Binding Protein 2 organizes Ca<sup>2+</sup> channel topography and regulates  
385 release probability and vesicle replenishment at a fast central synapse. *Journal of*  
386 *Neuroscience* **41**, 7742–7767 (2021).
- 387 31. Consortium, G. The Genotype-Tissue Expression (GTEx) pilot analysis: multitissue gene  
388 regulation in humans. *Science* **348**, 648–660 (2015).
- 389 32. Kia, S. K. *et al*. RTTN mutations link primary cilia function to organization of the human  
390 cerebral cortex. *The American Journal of Human Genetics* **91**, 533–540 (2012).
- 391 33. Cavallin, M. *et al*. Recurrent RTTN mutation leading to severe microcephaly, polymicrogyria  
392 and growth restriction. *European journal of medical genetics* **61**, 755–758 (2018).
- 393 34. Stouffs, K. *et al*. Biallelic mutations in RTTN are associated with microcephaly, short stature  
394 and a wide range of brain malformations. *European journal of medical genetics* **61**, 733–737  
395 (2018).
- 396 35. Walker, D., Whetzel, A. & Lue, L.-F. Expression of suppressor of cytokine signaling genes in  
397 human elderly and Alzheimer’s disease brains and human microglia. *Neuroscience* **302**,  
398 121–137 (2015).
- 399 36. Ziyatdinov, A. *et al*. Estimating the effective sample size in association studies of  
400 quantitative traits. *G3* **11**, jkab057 (2021).

- 401 37. Moore, C. M., Jacobson, S. A. & Fingerlin, T. E. Power and sample size calculations for  
402 genetic association studies in the presence of genetic model misspecification. *Human*  
403 *heredity* **84**, 256–271 (2019).
- 404 38. Kim, D. Y., Quinlan, E. B., Gramer, R. & Cramer, S. C. BDNF Val66Met polymorphism is  
405 related to motor system function after stroke. *Physical therapy* **96**, 533–539 (2016).
- 406 39. Kim, J.-M. *et al.* Associations of BDNF genotype and promoter methylation with acute and  
407 long-term stroke outcomes in an East Asian cohort. *PloS one* **7**, e51280 (2012).
- 408 40. Chan, A., Yan, J., Csurhes, P., Greer, J. & McCombe, P. Circulating brain derived  
409 neurotrophic factor (BDNF) and frequency of BDNF positive T cells in peripheral blood in  
410 human ischemic stroke: effect on outcome. *Journal of neuroimmunology* **286**, 42–47 (2015).
- 411 41. Gómez-Pinilla, F., Ying, Z., Roy, R. R., Molteni, R. & Edgerton, V. R. Voluntary exercise  
412 induces a BDNF-mediated mechanism that promotes neuroplasticity. *Journal of*  
413 *neurophysiology* **88**, 2187–2195 (2002).
- 414 42. Jr, H. P. A. *et al.* Classification of subtype of acute ischemic stroke. Definitions for use in a  
415 multicenter clinical trial. TOAST. Trial of Org 10172 in Acute Stroke Treatment. *stroke* **24**,  
416 35–41 (1 1993).

417 **11 Tables**

| <b>VISP Cohort (n=488)</b>        |                |
|-----------------------------------|----------------|
| <b>Treatment Arm</b>              |                |
| High Dose                         | 225 (47%)      |
| Low Dose                          | 251 (53%)      |
| <b>Age in Years</b>               |                |
| Mean (SD)                         | 66 ( ± 11)     |
| <b>Sex</b>                        |                |
| Male                              | 310 (64%)      |
| <b>Weakest Limb</b>               |                |
| Arm                               | 333 (67%)      |
| <b>Stroke Onset to Enrollment</b> |                |
| Days                              | 72.5 ( ± 31.2) |
| <b>Body Mass Index (BMI)</b>      |                |
| N-Miss                            | 7              |
| Mean (SD)                         | 28.54 (6.47)   |
| <b>Hypertension</b>               |                |
| N-Miss                            | 1              |
| No                                | 114 (23%)      |
| Yes                               | 383 (77%)      |
| <b>Ever Smoker</b>                |                |
| N-Miss                            | 1              |
| No                                | 173 (36%)      |
| Yes                               | 314 (64%)      |
| <b>Diabetes Mellitus Type II</b>  |                |
| No                                | 331 (68%)      |
| Yes                               | 157 (32%)      |
| <b>Ancestry</b>                   |                |
| European                          | 347 (73%)      |
| African                           | 92 (19%)       |
| Other                             | 37 (8%)        |

Table 1: Vitamin Intervention for Stroke Prevention (VISP) trial demographics. Information is presented as counts (percentages) or means (standard deviations).

## 418 12 Figure Legends

419 **Figure 1:** Shows the non-linear relationship of the mean probability of motor improvement for  
420 each follow up time point since study enrollment. The green and orange lines segments highlight  
421 the notable change in slopes from 1 to 6 month visits to 6 to 24 month visits. The difference in  
422 slope between the two time periods is similar to stroke rehab trials of the upper extremity.

423 **Figure 2:** This Manhattan plot shows each SNP and its  $-\log_{10}(p \text{ value})$  associated with post  
424 stroke motor improvement. None of the SNPs reached genome-wide significant (above the red  
425 line). However, 115 SNPs had suggestive associations (above the blue line) with 2 right under  
426 the red line. The most convincing genetic loci is the large spike in chromosome 8; near the  
427 Claudin 23 gene. This gene affects blood brain barrier and immune cell transmigration.

428 **Figure 3:** Panel plot of Locus Zoom figures (A-D) corresponding to genetic loci of interest. The  
429 colors refers to correlation of each SNP to the top SNP in each panel with red having an  
430  $r^2 \geq 0.80$ . **A** Genetic locus near the CLDN23 gene on chromosome 8. **B** Genetic locus within the  
431 PTPRD gene on chromosome 9. **C** Genetic locus within the RIMBP2 gene on chromosome 12. **D**  
432 Genetic locus between the RTTN and SOCS6 genes on chromosome 18.

433 **Figure 4:** Shows the estimates and 95% confidence intervals of the interaction of the study  
434 timepoints 1 to 6 months versus 6 to 24 months with each suggestive SNP found in Chromosome  
435 8. Interestingly, the interaction estimates of many SNPs seem to straddle one with SNP  
436 estimates at 1 to 6 months having a greater odds of motor recovery, while SNP estimates at 6 to  
437 24 months having less.

438 **Figure 5:** Shows odds ratios and 95% confidence intervals of motor drift score improvement from  
439 the interaction Early versus Late post-stroke enrollment by SNP in Chromosome 8. The odds  
440 ratios estimates for Early versus Late do not have a discernible pattern or consistency.

441 **13 Figures**

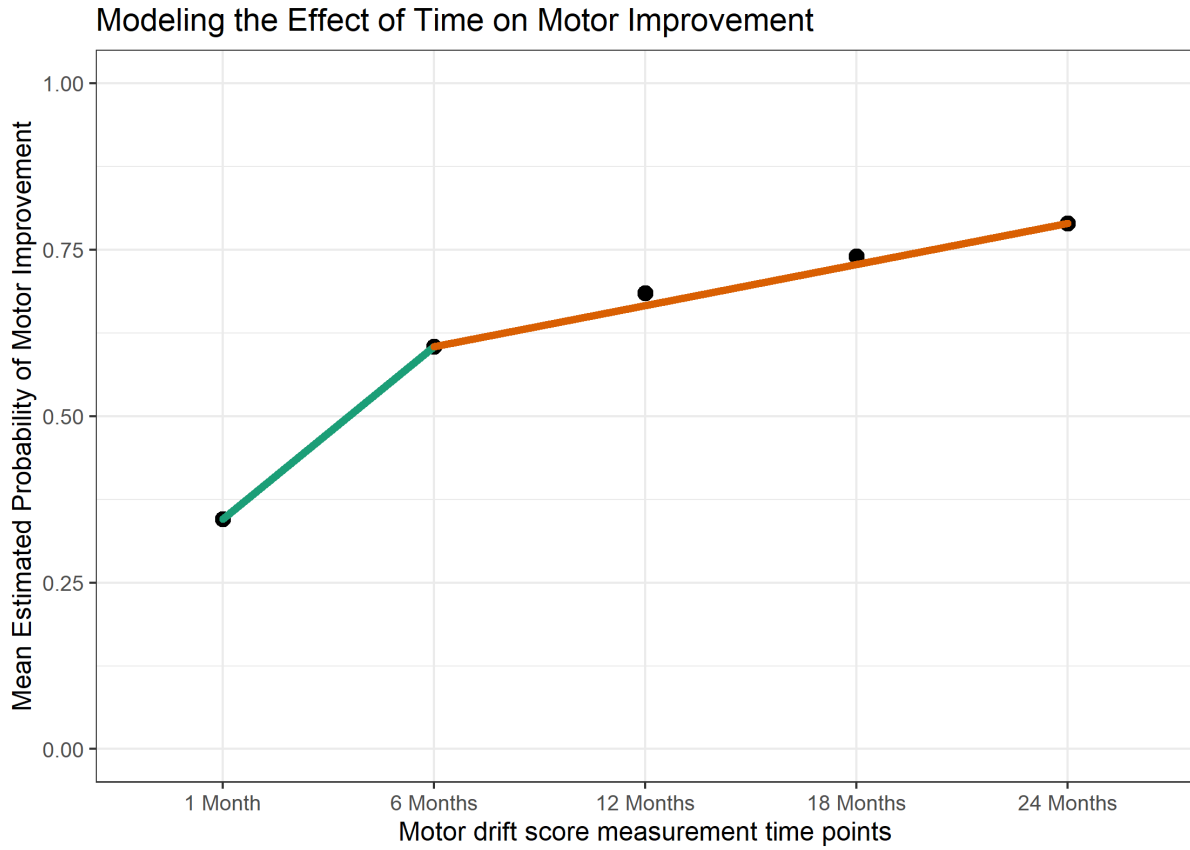

Figure 1: Shows the non-linear relationship of the mean probability of motor improvement for each follow up time point since study enrollment. The green and orange line segments highlight the notable change in slopes from 1 to 6 month visits to 6 to 24 month visits. The difference in slope between the two time periods is similar to stroke rehab trials of the upper extremity.

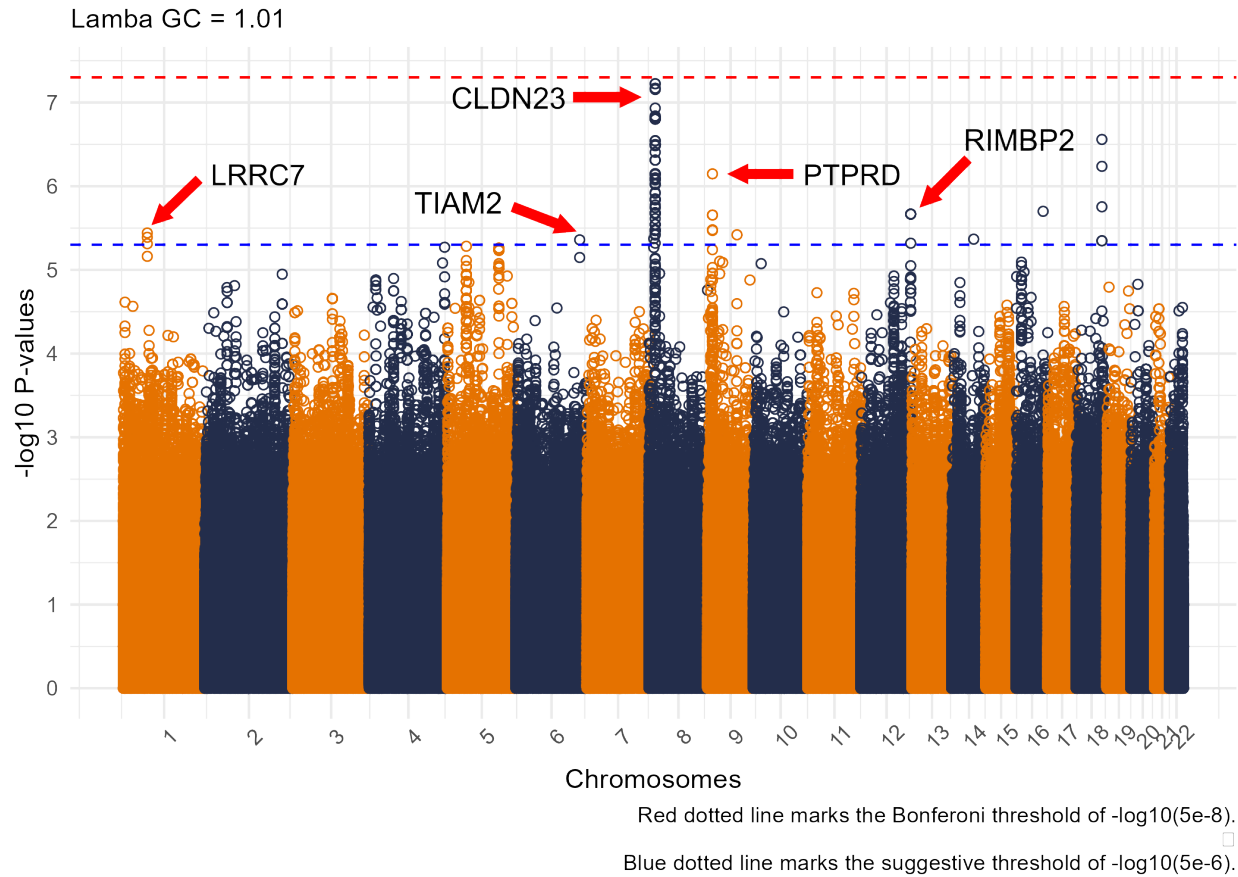

Figure 2: This Manhattan plot shows each SNP and its  $-\log_{10}(p \text{ value})$  associated with post stroke motor improvement. None of the SNPs reached genome-wide significant (above the red line). However, 115 SNPs had suggestive associations (above the blue line) with 2 right under the red line. The most convincing genetic loci is the large spike in chromosome 8; near the Claudin 23 gene. This gene affects blood brain barrier and immune cell transmigration.

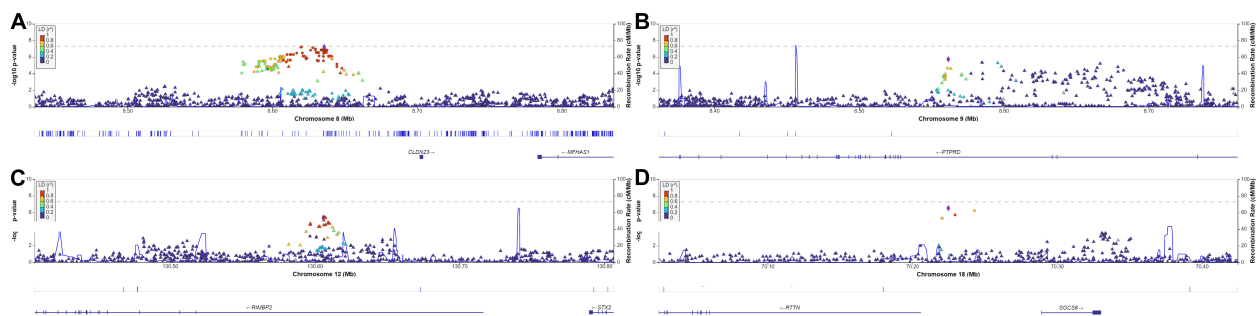

Figure 3: Panel plot of Locus Zoom figures (A-D) corresponding to genetic loci of interest. The colors refers to correlation of each SNP to the top SNP in each panel with red having an  $r^2 \geq 0.80$ . **A** Genetic locus near the CLDN23 gene on chromosome 8. **B** Genetic locus within the PTPRD gene on chromosome 9. **C** Genetic locus within the RIMBP2 gene on chromosome 12. **D** Genetic locus between the RTTN and SOCS6 genes on chromosome 18.

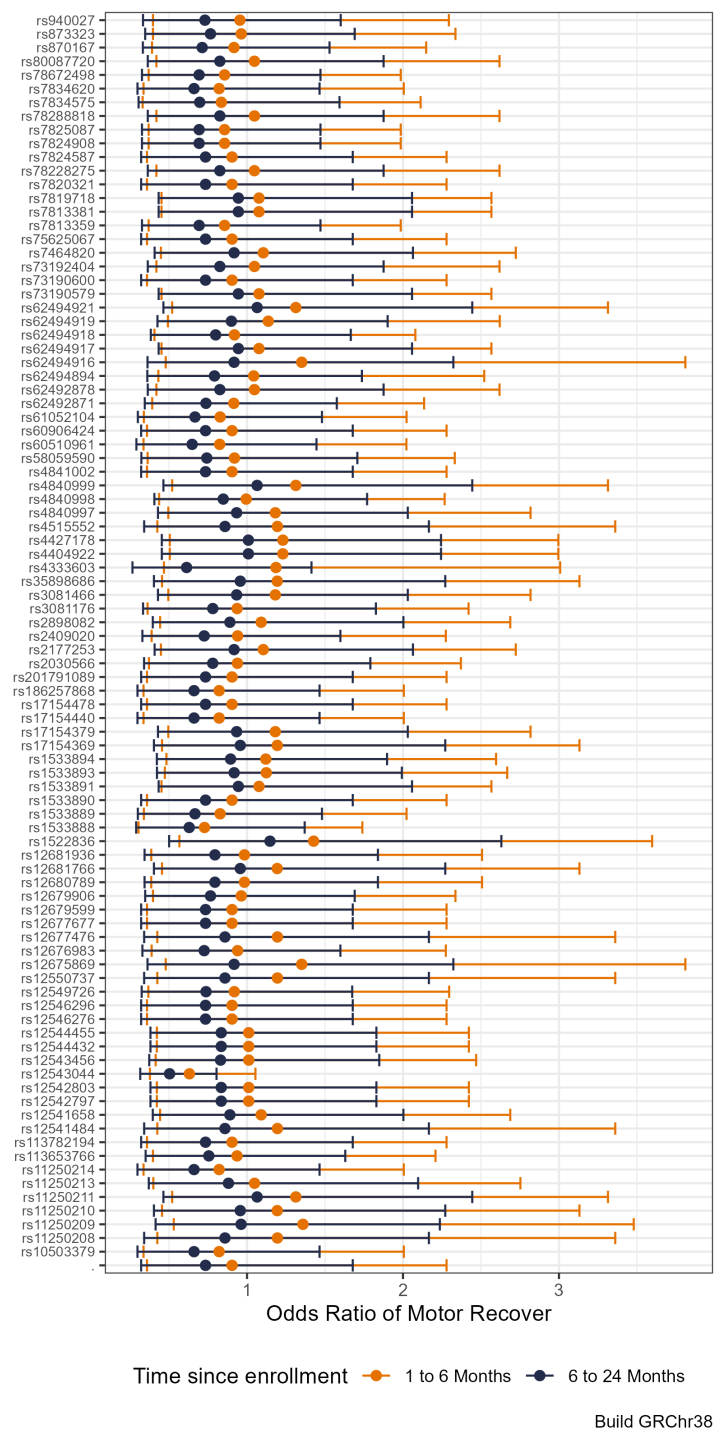

Figure 4: Shows the estimates and 95% confidence intervals of the interaction of the study time-points 1 to 6 months versus 6 to 24 months with each suggestive SNP found in Chromosome 8. Interestingly, the interaction estimates of many SNPs seem to straddle one with SNP estimates at 1 to 6 months having a greater odds of motor recovery, while SNP estimates at 6 to 24 months having less.



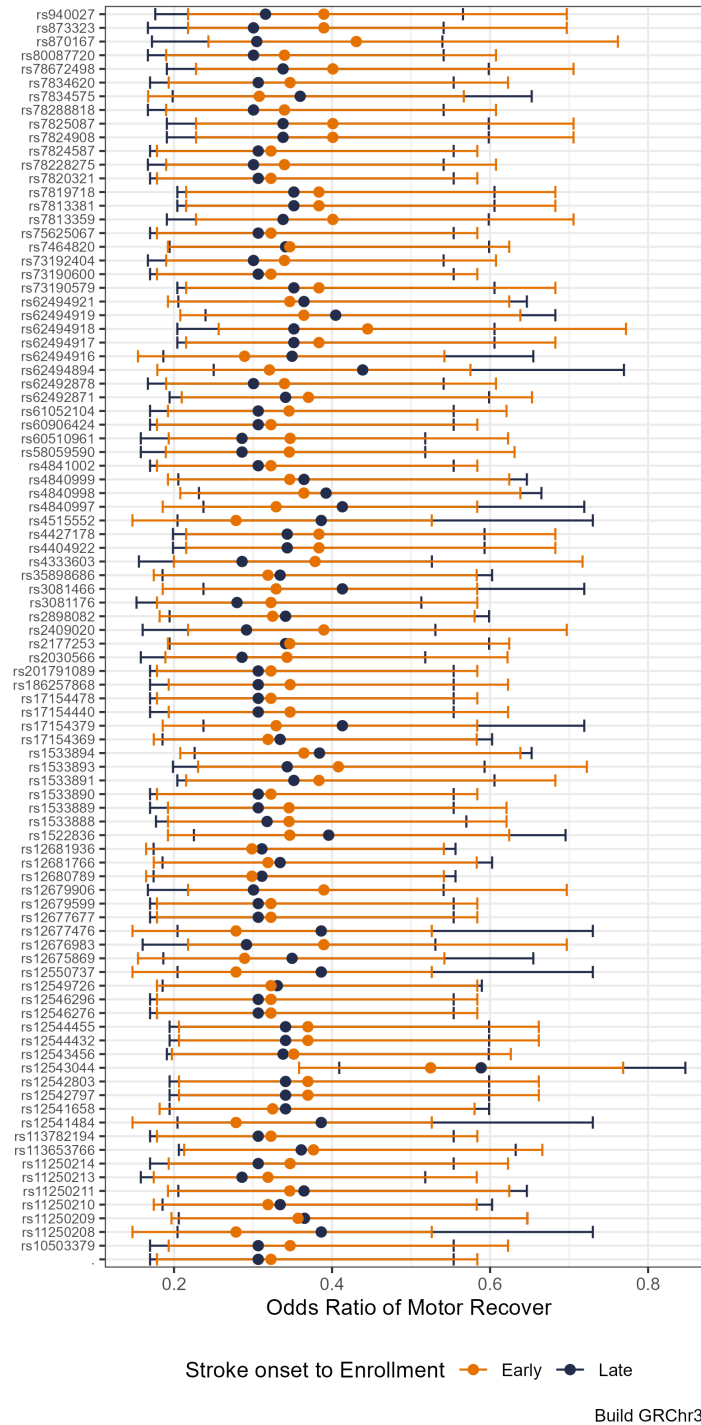

Figure 5: Shows odds ratios and 95% confidence intervals of motor drift score improvement from the interaction Early versus Late post-stroke enrollment by SNP in Chromosome 8. The odds ratios estimates for Early versus Late do not have a discernible pattern or consistency.
